# Supplementary material for: Impact of the COVID-19 Pandemic on Antibiotic Prescribing by Dentists in Galicia, Spain: A Quasi-Experimental Approach
Source: MDPI journal article supplement (doi:10.3390/antibiotics11081018), 2022-07-29
Supplement: s1 [file s1]

## Appendix A

Table S1. Defined daily dose by active ingredient as prescribed by primary-care dentists, according to the AWaRe Classification[49].

| Antibiotic                    | ATC code | Category | DDD WHO * | DDD prescribed |
|-------------------------------|----------|----------|-----------|----------------|
| Amoxicillin                   | J01CA04  | Access   | 1.5       | 899795         |
| Amoxicillin/clavulanic acid   | J01CR02  | Access   | 1.5       | 791368         |
| Azithromycin                  | J01FA10  | Watch    | 0.3       | 62668          |
| Clindamycin                   | J01FF01  | Access   | 1.2       | 38034          |
| Cefuroxime                    | J01DC02  | Watch    | 0.5       | 13906          |
| Erythromycin                  | J01FA01  | Watch    | 1.0       | 11203          |
| Spiramycin                    | J01FA02  | Watch    | 3.0       | 7992           |
| Miocamycin                    | J01FA11  | Watch    | 1.2       | 3009           |
| Clarithromycin                | J01FA09  | Watch    | 0.5       | 2863           |
| Ciprofloxacin                 | J01MA02  | Watch    | 1.0       | 2377           |
| Levofloxacin                  | J01MA12  | Watch    | 0.5       | 1631           |
| Doxycycline                   | J01AA02  | Access   | 0.1       | 1126           |
| Cefixime                      | J01DD08  | Watch    | 0.4       | 338            |
| Moxifloxacin                  | J01MA14  | Watch    | 0.4       | 333            |
| Cloxacilin                    | J01CF02  | Access   | 2.0       | 285            |
| Phenoxymethylpenicillin       | J01CE02  | Access   | 2.0       | 268            |
| Josamycin                     | J01FA07  | Watch    | 2.0       | 228            |
| Cefditoren                    | J01DD16  | Watch    | 0.4       | 270            |
| Fosfomycin                    | J01XX01  | Watch    | 3.0       | 223            |
| Cefalexin                     | J01DB01  | Access   | 2.0       | 210            |
| Minocycline                   | J01AA08  | Watch    | 0.2       | 132            |
| Sulfamethoxazole/trimethoprim | J01EC01  | Access   | 2.0       | 110            |
| Norfloxacin                   | J01MA06  | Watch    | 0.8       | 35             |
| Procaine-benzylpenicillin     | J01CE09  | Access   | 0.6       | 28             |
| Nitrofurantoin                | J01XE01  | Access   | 0.2       | 21             |
| Benzylpenicillin              | J01CE01  | Access   | 3.6       | 20             |
| Cefaclor                      | J01DC04  | Watch    | 1.0       | 20             |
| Roxithromycin                 | J01FA06  | Watch    | 0.3       | 20             |
| Benzathine-benzylpenicillin   | J01CE08  | Access   | 3.6       | 17             |
| Ampicillin                    | J01CA01  | Access   | 2.0       | 15             |

DDD=Defined daily dose

\* DDD defined by WHO index 2022
